# Supplementary material for: Emulating grid-based forest carbon dynamics using machine learning: an LPJ-GUESS v4.1.1 application
Source: Copernicus journal article supplement (doi:10.5194/egusphere-2024-4064), 2025-02-03
Supplement: Supplementary file 1 [file egusphere-2024-4064-supplement.pdf]

## **S1. LPJ-GUESS Model Modifications, Experimental Setup and Forcing Data**

We used LPJ-GUESS version 4.1.1 (Nord et al., 2021) for our simulations. To ensure reproducibility, we provide a list of modifications made to the model, which are also documented in our GitHub repository: <https://github.com/natel-c/lpjg-modif-emulator>

- **Modification 1:** Implemented an eXtended NetCDF input (cfxinput.h/cpp).
- **Modification 2:** Added output for annual climate data.
- **Modification 3:** Introduced a parameter to apply a fixed nitrogen deposition across simulations (fixed\_nde and fixed\_nde\_year).
- **Modification 4:** Enabled the output of spin-up period results (if\_spinup\_outputs).
- **Modification 5:** Added spinup\_clear2\_year parameter to control stand-replacing disturbances.

### **Experimental Setup**

For the LPJ-GUESS simulations, the following settings were applied:

- Fire model: Disabled.
- Nitrogen deposition: Held constant at 2015 levels, following Lamarque et al. (2013).
- Disturbance interval: Default LPJ-GUESS setting of 100 years.
- Replicate number of patches: 50.
- Vegetation type: Potential natural vegetation only, to simplify ecosystem carbon responses and isolate climate-driven impacts.

Each simulation began with a 500-year spin-up to stabilize carbon pools, using the 1901 atmospheric CO<sub>2</sub> concentration and repeating, detrended 1901–1930 climate data. Following the spin-up, a stand-replacing disturbance (via spinup\_clear2\_year) simulated a clear-cut, removing all vegetation and exposing soil. Vegetation residues were left on-site, contributing to litter and soil carbon pools. Post-disturbance, natural vegetation regrew under historical (1850–2014) and future (2015–2100) conditions. Land-use changes were not incorporated.

### **Forcing Data**

The simulations used both historical (1850–2014) and future (2015–2100) climate data. Future runs began from the end state of the historical period.

- **Climate Data:** Bias-corrected CMIP6 data from the ISIMIP 3b project (Lange, 2019) was used, including five Earth System Models (ESMs) to cover climate sensitivity variations: IPSL-CM6A-LR, MPI-ESM1-2-HR, MRI-ESM2-0, GFDL-ESM4, and UKESM1-0-LL. Simulations included four Representative Concentration Pathways (RCPs): RCP2.6, RCP4.5, RCP7.0, and RCP8.5.
- **Nitrogen Deposition:** Set at 2015 levels based on Lamarque et al. (2013) data.
- **Atmospheric CO<sub>2</sub> Concentrations:** Aligned with observed CO<sub>2</sub> mixing ratios for each RCP scenario.

**Table S1. Random forests hyperparameters, showing the values tested during the hyperparameter grid search and the best values for each task (Carbon stocks: C stocks and Carbon fluxes: C fluxes).**

| Hyperparameter    | Description                                                         | Values                   | Best value (C stocks   C fluxes) |
|-------------------|---------------------------------------------------------------------|--------------------------|----------------------------------|
| n_estimators      | Number of trees in the random forest                                | 350, 500, 600, 700, 1000 | 1000   1000                      |
| max_samples       | The number of samples to draw from data to train each decision tree | 0.2, 0.4, 0.6, 0.8, 1.0  | 0.2   0.2                        |
| max_features      | Number of features to consider when looking for the best split      | 0.2, 0.4, 0.6, 0.8, 1.0  | 0.8   0.8                        |
| max_depth         | Maximum depth of the decision tree                                  | 200, 1000, 2000          | 200   200                        |
| min_samples_split | Minimum number of samples required to split an internal node        | 10, 20, 250, 400         | 250   250                        |

**Table S2. Neural network hyperparameters, showing the values tested during the hyperparameter grid search and the best values for each task (Carbon stocks: C stocks and Carbon fluxes: C fluxes).**

| Hyperparameter      | Name                | Description                                                                                                                   | Values           | Best value (C stocks   C fluxes) |
|---------------------|---------------------|-------------------------------------------------------------------------------------------------------------------------------|------------------|----------------------------------|
| learning_rate       | Learning rate       | Controls the step size at each iteration while moving toward a minimum of the loss function.                                  | 0.001, 0.01, 0.1 | 0.001   0.001                    |
| layers              | Number of layers    | Defines the depth of the neural network. Each layer encapsulates a state (weights) and some computation.                      | 1, 2, 3          | 2   2                            |
| neurons             | Number of neurons   | The basic computational units in a neural network layer. More neurons can capture more complex patterns.                      | 32, 64, 128      | 64   128                         |
| activation_function | Activation function | Introduces non-linearity into the network, allowing it to learn complex patterns.                                             | 'relu', 'tanh'   | 'tanh'   'relu'                  |
| dropout_rate        | Dropout rate        | A regularization technique to prevent overfitting. Determines the proportion of neurons randomly set to zero during training. | 0, 0.2, 0.5      | 0.2   0.2                        |
| batch_size          | Batch size          | Determines the number of samples processed before the model is updated. Affects training speed and stability.                 | 32, 64, 128      | 32   128                         |
